# Supplementary material for: Permeabilizing Cell Membranes with Electric Fields
Source: MDPI journal article supplement (doi:10.3390/cancers13092283), 2021-05-10
Supplement: s1 [file s1]

**Estimated model parameters using the patch-clamp technique**

| Rate Constant | Wild-type control | Wild-type FPL     | IIS4N control     | IIS4N FPL         | A780T control       | A780T FPL             |
|---------------|-------------------|-------------------|-------------------|-------------------|---------------------|-----------------------|
| $\alpha$      | $0.27 \pm 0.06$   | $0.26 \pm 0.01$   | $0.16 \pm 0.03$   | $0.08 \pm 0.02$   | $0.24 \pm 0.09$     | $0.09 \pm 0.04$       |
| $\beta$       | $0.21 \pm 0.04$   | $0.07 \pm 0.03$   | $0.31 \pm 0.07$   | $0.14 \pm 0.02$   | $0.61 \pm 0.08$     | $0.22 \pm 0.05$       |
| $\gamma$      | $0.02 \pm 0.01$   | $0.002 \pm 0.001$ | $0.03 \pm 0.01$   | $0.003 \pm 0.001$ | $0.01 \pm 0.01$     | $0.014 \pm 0.006$     |
| $\delta$      | $2.09 \pm 1.05$   | $2.68 \pm 1.00$   | $2.48 \pm 1.23$   | $1.36 \pm 0.81$   | $1.85 \pm 0.29$     | $1.45 \pm 0.12$       |
| $x_0$         | $1.65 \pm 0.80$   | $7.77 \pm 3.41$   | $1.35 \pm 0.50$   | $1.33 \pm 0.38$   | $2.81 \pm 0.97$     | $57.14 \pm 14.63$     |
| $y_0$         | $0.21 \pm 0.07$   | $0.17 \pm 0.09$   | $0.16 \pm 0.04$   | $0.02 \pm 0.003$  | $0.0008 \pm 0.0003$ | $0.00018 \pm 0.00003$ |
| $k_x$         | $12.39 \pm 3.12$  | $5.67 \pm 0.82$   | $10.42 \pm 2.29$  | $8.07 \pm 0.74$   | $16.84 \pm 1.82$    | $5.85 \pm 0.20$       |
| $k_y$         | $51.61 \pm 37.06$ | $25.32 \pm 5.31$  | $74.70 \pm 33.78$ | $29.72 \pm 4.32$  | $7.08 \pm 0.79$     | $12.30 \pm 0.90$      |
| $G$           | $19.68 \pm 6.72$  | $60.86 \pm 9.90$  | $22.47 \pm 9.68$  | $40.03 \pm 9.32$  | $108.24 \pm 36.55$  | $330.04 \pm 92.47$    |

FPL: In the presence of Calcium agonist FPL 64174 (1  $\mu$ M)

Reference: <https://pubmed.ncbi.nlm.nih.gov/25966699/>

**\*\*Rate constants of A $\leftrightarrow$ O and R $\leftrightarrow$ D transitions (in ms<sup>-1</sup>), estimated using data from Hohaus et al. (2005). (shown below)**

| Construct              | $\alpha$        | $\beta$             | $\gamma$            | $\delta$        |
|------------------------|-----------------|---------------------|---------------------|-----------------|
| Wild-type <sup>a</sup> | $0.15 \pm 0.11$ | $0.24 \pm 0.08$     | $0.021 \pm 0.021$   | $1.39 \pm 0.17$ |
| G770P                  | $0.33 \pm 0.31$ | $0.31 \pm 0.21$     | $0.030 \pm 0.073$   | $0.56 \pm 0.11$ |
| N771P <sup>a</sup>     | $0.95 \pm 0.63$ | $0.11 \pm 0.07$     | $0.111 \pm 0.057$   | $1.41 \pm 0.23$ |
| F778P <sup>a</sup>     | $0.13 \pm 0.12$ | $0.28 \pm 0.09$     | $0.016 \pm 0.026$   | $0.70 \pm 0.09$ |
| L779P <sup>a</sup>     | $1.79 \pm 0.81$ | $0.11 \pm 0.02$     | $0.002 \pm 0.002$   | $0.36 \pm 0.09$ |
| A780P <sup>a</sup>     | $0.19 \pm 0.03$ | $0.0064 \pm 0.0022$ | $0.015 \pm 0.005$   | $0.14 \pm 0.02$ |
| A780G                  | $0.96 \pm 0.62$ | $0.27 \pm 0.12$     | $0.037 \pm 0.022$   | $2.10 \pm 0.33$ |
| I781T <sup>a</sup>     | $1.95 \pm 0.91$ | $0.045 \pm 0.012$   | $0.009 \pm 0.003$   | $1.02 \pm 0.26$ |
| I781P <sup>a</sup>     | $4.16 \pm 1.86$ | $0.034 \pm 0.007$   | $0.003 \pm 0.001$   | $0.74 \pm 0.43$ |
| I781G                  | $1.73 \pm 0.81$ | $0.036 \pm 0.010$   | $0.011 \pm 0.003$   | $0.78 \pm 0.18$ |
| I781A <sup>a</sup>     | $1.72 \pm 0.79$ | $0.132 \pm 0.028$   | $0.003 \pm 0.001$   | $1.55 \pm 0.44$ |
| I781V <sup>a</sup>     | $0.55 \pm 0.30$ | $0.22 \pm 0.03$     | $0.0003 \pm 0.0002$ | $2.01 \pm 0.77$ |
| I781N <sup>a</sup>     | $2.17 \pm 0.99$ | $0.10 \pm 0.02$     | $0.003 \pm 0.002$   | $0.74 \pm 0.20$ |
| A782P <sup>a</sup>     | $2.65 \pm 1.23$ | $0.111 \pm 0.026$   | $0.004 \pm 0.002$   | $0.94 \pm 0.27$ |
| A782G                  | $1.74 \pm 0.97$ | $0.32 \pm 0.10$     | $0.013 \pm 0.009$   | $1.96 \pm 0.37$ |
| D784G                  | $0.88 \pm 0.53$ | $0.34 \pm 0.09$     | $0.008 \pm 0.006$   | $1.62 \pm 0.35$ |

<sup>a</sup>: Rate constants determined using data from Hohaus et al. (2005). <https://pubmed.ncbi.nlm.nih.gov/16157588/>

Reference: <https://www.ncbi.nlm.nih.gov/pmc/articles/PMC2737230/>

**The influence of IIS6 pore mutations on voltage-dependent gating of CaV1.2**

Midpoints and slope factors of the activation curves and amount of channel inactivation during a 300-ms pulse ( $r_{300}$ ) to the peak potentials of the I–V curve.

|                                                          | Half-activation | Slope         | $r_{300}$  |
|----------------------------------------------------------|-----------------|---------------|------------|
|                                                          | mV              | mV            | %          |
| <b>Co-expression of <math>\beta^1</math><sup>a</sup></b> |                 |               |            |
| Wild-type                                                | $-9.9 \pm 1.1$  | $6.3 \pm 0.7$ | $65 \pm 4$ |
| I781T                                                    | $-37.7 \pm 1.2$ | $7.2 \pm 1.0$ | $47 \pm 3$ |

|                                                 |               |           |        |
|-------------------------------------------------|---------------|-----------|--------|
| I781P                                           | -47.2 ± 1.1   | 6.3 ± 0.6 | 53 ± 6 |
| I781L                                           | -20.6 ± 1.2   | 6.1 ± 0.2 | 63 ± 7 |
| I781A                                           | -29.5 ± 0.6   | 7.9 ± 0.5 | 51 ± 4 |
| I781N                                           | -34.6 ± 1.6   | 9.1 ± 0.4 | 37 ± 6 |
| I781Q                                           | No currents   | N/A       | N/A    |
| I781R                                           | No currents   | N/A       | N/A    |
| C769P                                           | 2.8 ± 0.8     | 4.9 ± 1.0 | 67 ± 7 |
| G770P                                           | -11.4 ± 1.3   | 5.8 ± 0.3 | 62 ± 4 |
| N771P                                           | -26.9 ± 1.1   | 4.9 ± 0.2 | 43 ± 4 |
| Y772P                                           | No currents   | N/A       | N/A    |
| I773P                                           | -14.2 ± 1.8   | 2.9 ± 0.6 | 65 ± 6 |
| L774P                                           | No currents   | N/A       | N/A    |
| L775P                                           | No currents   | N/A       | N/A    |
| N776P                                           | No currents   | N/A       | N/A    |
| V777P                                           | No currents   | N/A       | N/A    |
| F778P                                           | -9.3 ± 0.8    | 7.7 ± 0.3 | 23 ± 3 |
| L779P                                           | -29.78 ± 1.90 | 6.0 ± 0.4 | 3 ± 1  |
| A780P                                           | -37.1 ± 0.7   | 5.7 ± 0.8 | 2 ± 1  |
| A782P                                           | -35.7 ± 1.4   | 9.8 ± 0.3 | 30 ± 5 |
| V783P                                           | No currents   | N/A       | N/A    |
| <b>Co-expression of <math>\beta^{2a}</math></b> |               |           |        |
| Wild-type                                       | -13.8 ± 0.9   | 6.0 ± 0.5 | 16 ± 5 |
| I781T                                           | -44.9 ± 1.4   | 8.8 ± 1.0 | 25 ± 4 |
| I781P                                           | -52.3 ± 1.3   | 7.3 ± 0.8 | 27 ± 6 |

$\beta^{1a}$ :  $\beta$  subunit of a DHP-sensitive calcium channel in skeletal muscle with the DNA sequence from Perez-Reyes et al. 1989 (<https://pubmed.ncbi.nlm.nih.gov/2549640/>)

$\beta^{2a}$ :  $\beta$  subunit of a DHP-receptor/calcium channel in skeletal muscle with the DNA sequence from Perez-Reyes et al. 1992 (<https://pubmed.ncbi.nlm.nih.gov/1370480/>)

Reference: <https://pubmed.ncbi.nlm.nih.gov/16157588/>

### Model parameters describing the R $\leftrightarrow$ A transition

| Rate constant          | Estimated value |
|------------------------|-----------------|
| x0 (ms <sup>-1</sup> ) | 0.427 ± 0.029   |
| kx (mV)                | 328.8 ± 447.4   |
| y0 (ms <sup>-1</sup> ) | 0.216 ± 0.084   |
| ky (mV)                | 9.04 ± 0.52     |

Reference: <https://www.ncbi.nlm.nih.gov/pmc/articles/PMC2737230/>

### Rate constants of pore opening and closure

|           | $\alpha$ | $\beta$ | $\gamma$ | $\delta$ |
|-----------|----------|---------|----------|----------|
| Wild-type | 0.2      | 0.25    | 0.08     | 1.2      |
| I781T     | 8.3      | 0.07    | 0.011    | 0.6      |
| I781P     | 22       | 0.035   | 0.007    | 0.3      |

### Parameters for voltage dependent rate constants x(V) and y(V)

| Rate constant          | Estimated value |
|------------------------|-----------------|
| x0 (ms <sup>-1</sup> ) | 0.38            |

|                        |      |
|------------------------|------|
| kx (mV)                | 55   |
| y0 (ms <sup>-1</sup> ) | 0.17 |
| ky (mV)                | 8    |

Reference: <https://www.ncbi.nlm.nih.gov/pmc/articles/PMC3196840/>

#### Midpoints and slope factors of the activation curve of CaV1.2 IIS6 mutants

| Mutant                 | Half-activation<br><i>mV</i> | Slope<br><i>mV</i> |
|------------------------|------------------------------|--------------------|
| Wild-type <sup>a</sup> | -9.9 ± 1.1                   | 6.3 ± 0.7          |
| A780P <sup>a</sup>     | -37.1 ± 0.7                  | 5.7 ± 0.8          |
| A780G                  | -19.3 ± 0.8                  | 6.3 ± 0.6          |
| I781P <sup>a</sup>     | -47.2 ± 1.1                  | 6.3 ± 0.6          |
| I781G                  | -40.2 ± 0.8                  | 7.5 ± 0.7          |
| I781T <sup>a</sup>     | -37.7 ± 1.2                  | 7.2 ± 1.0          |
| A782P <sup>a</sup>     | -35.7 ± 1.4                  | 9.8 ± 0.3          |
| A782G                  | -22.2 ± 0.4                  | 7.8 ± 0.4          |
| V783G                  | No current                   | N/A                |
| D784G                  | -15.6 ± 1.1                  | 6.3 ± 0.6          |

a: Data from Hohaus et al. (2005). <https://pubmed.ncbi.nlm.nih.gov/16157588/>

Reference: <https://www.ncbi.nlm.nih.gov/pmc/articles/PMC2737230/>

#### S4 Segments of Cav 1.2 Channels: Midpoints and slope factors (k) of the activation curves and estimated effective charge (αZ)

| Mutant                                         | V0.5, mV              | <i>k act</i> , mV | αZ          |
|------------------------------------------------|-----------------------|-------------------|-------------|
| Wild-type                                      | -18.6 ± 0.8 (n = 7)   | 5.9 ± 0.9         | 4.27 ± 0.65 |
| G432W <sup>b</sup>                             | -33.7 ± 0.6 (n = 8)   | 4.7 ± 0.4         | 5.36 ± 0.46 |
| A780T <sup>b</sup>                             | -44.0 ± 0.6 (n = 5)   | 5.1 ± 0.6         | 4.94 ± 0.58 |
| G1193T <sup>b</sup>                            | -49.8 ± 1.0 (n = 7)   | 5.1 ± 0.6         | 4.94 ± 0.58 |
| A1503G <sup>b</sup>                            | -41.4 ± 0.8 (n = 5)   | 5.8 ± 0.5         | 4.34 ± 0.37 |
| <b>IS4 neutralisations</b>                     |                       |                   |             |
| IS4N                                           | No detectable current |                   |             |
| K264Q/R267Q/R270Q/R273Q (IS4N+R276)            | -33.1 ± 1.1 (n = 5)   | 8.5 ± 0.6         | 2.96 ± 0.21 |
| K264Q/R267Q/R270Q (IS4N+R276+R273)             | -16.3 ± 0.7 (n = 4)   | 9.9 ± 0.7         | 2.54 ± 0.18 |
| G432W/R267Q                                    | -11.9 ± 1.0 (n = 4)   | 8.5 ± 0.8         | 2.96 ± 0.28 |
| G432W/IS4N+R276                                | No detectable current |                   |             |
| A780T/R267Q                                    | -28.5 ± 1.3 (n = 4)   | 9.6 ± 0.7         | 2.62 ± 0.19 |
| A780T/IS4N+R276                                | -42.7 ± 1.1 (n = 4)   | 11.9 ± 1.0        | 2.12 ± 0.18 |
| A780T/K264Q/R267Q/R270Q (A780T/IS4N+R276+R273) | -33.5 ± 0.6 (n = 4)   | 11.5 ± 0.6        | 2.19 ± 0.11 |
| G1193T/R267Q                                   | -28.6 ± 0.9 (n = 5)   | 9.1 ± 0.5         | 2.77 ± 0.15 |
| G1193T/IS4N+R276                               | No detectable current |                   |             |
| A1503G/R267Q                                   | -28.5 ± 0.6 (n = 5)   | 9.1 ± 0.4         | 2.77 ± 0.12 |
| A1503G/IS4N+R276                               | -41.1 ± 0.6 (n = 5)   | 8.7 ± 0.5         | 2.89 ± 0.17 |
| <b>IIS4 neutralisations</b>                    |                       |                   |             |
| IIS4N <sup>a</sup>                             | -17.5 ± 0.8 (n = 11)  | 6.7 ± 0.7         | 3.76 ± 0.39 |
| R650Q/R653Q/R656Q/K659Q (IIS4N+R662)           | -23.9 ± 1.0 (n = 6)   | 6.3 ± 0.7         | 4.00 ± 0.44 |

|                                                 |                       |           |             |
|-------------------------------------------------|-----------------------|-----------|-------------|
| R650Q/R653Q/R656Q (IIS4N+R662+K659)             | -18.2 ± 0.7 (n = 5)   | 7.2 ± 0.6 | 3.50 ± 0.29 |
| R650Q/R653Q                                     | -25.1 ± 0.9 (n = 5)   | 5.7 ± 0.6 | 4.42 ± 0.47 |
| G432W/R656Q                                     | -17.9 ± 0.9 (n = 5)   | 6.0 ± 0.7 | 4.20 ± 0.49 |
| G432W/IIS4N+R662                                | -31.0 ± 0.6 (n = 5)   | 8.4 ± 0.8 | 3.00 ± 0.29 |
| G432W/IIS4N <sup>a</sup>                        | -19.3 ± 0.7 (n = 8)   | 5.8 ± 0.7 | 4.34 ± 0.52 |
| A780T/R650Q                                     | -30.7 ± 0.3 (n = 4)   | 5.7 ± 0.3 | 4.42 ± 0.23 |
| A780T/R653Q                                     | -30.2 ± 0.6 (n = 5)   | 5.3 ± 0.3 | 4.75 ± 0.27 |
| A780T/R656Q                                     | -33.5 ± 0.5 (n = 5)   | 6.5 ± 0.3 | 3.88 ± 0.18 |
| A780T/K659Q                                     | -32.0 ± 1.3 (n = 4)   | 7.1 ± 0.8 | 3.55 ± 0.40 |
| A780T/R662Q                                     | -34.0 ± 0.7 (n = 5)   | 5.4 ± 0.3 | 4.67 ± 0.26 |
| A780T/IIS4N+R662                                | -33.6 ± 0.6 (n = 4)   | 6.3 ± 0.3 | 4.00 ± 0.19 |
| A780T/IIS4N+R650                                | -39.4 ± 0.8 (n = 4)   | 6.1 ± 0.6 | 4.13 ± 0.41 |
| A780T/IIS4N <sup>a</sup>                        | -32.0 ± 0.7 (n = 10)  | 5.1 ± 0.7 | 4.94 ± 0.68 |
| G1193T/R650Q                                    | -39.0 ± 0.9 (n = 5)   | 6.8 ± 0.6 | 3.71 ± 0.33 |
| G1193T/R653Q                                    | -34.0 ± 0.6 (n = 6)   | 6.6 ± 0.5 | 3.82 ± 0.29 |
| G1193T/R656Q                                    | -38.3 ± 0.8 (n = 5)   | 5.0 ± 0.5 | 5.04 ± 0.50 |
| G1193T/K659Q                                    | -40.3 ± 0.9 (n = 4)   | 4.9 ± 0.5 | 5.14 ± 0.52 |
| G1193T/R662Q                                    | -40.2 ± 0.4 (n = 6)   | 5.7 ± 0.3 | 4.42 ± 0.23 |
| G1193T/IIS4N+R662                               | -38.0 ± 0.8 (n = 5)   | 6.1 ± 0.6 | 4.13 ± 0.41 |
| G1193T/IIS4N <sup>a</sup>                       | -20.8 ± 0.7 (n = 5)   | 7.5 ± 0.6 | 3.36 ± 0.27 |
| A1503G/R656Q                                    | -26.6 ± 0.7 (n = 5)   | 7.3 ± 0.5 | 3.45 ± 0.24 |
| A1503G/IIS4N+R662                               | -25.3 ± 1.0 (n = 6)   | 7.7 ± 0.6 | 3.27 ± 0.25 |
| A1503G/IIS4N <sup>a</sup>                       | -19.8 ± 0.7 (n = 6)   | 7.5 ± 0.7 | 3.36 ± 0.31 |
| <b>IIS4 neutralisations</b>                     |                       |           |             |
| IIS4N                                           | No detectable current |           |             |
| K1025Q/R1028Q/R1031Q/R1034Q/R1037 (IIS4N+R1041) | No detectable current |           |             |
| K1025Q/R1028Q/R1031Q/R1034Q (IIS4N+R1041+R1037) | -19.7 ± 0.9 (n = 5)   | 8.0 ± 0.5 | 3.15 ± 0.20 |
| R1034Q                                          | -23.4 ± 0.6 (n = 5)   | 6.5 ± 0.4 | 3.82 ± 0.23 |
| A780T/K1025Q/R1028Q/R1031Q/R1034Q               | -43.6 ± 0.6           | 9.3 ± 0.4 | 2.69 ± 0.12 |
| A780T/K1025Q/R1028Q                             | -34.7 ± 0.5 (n = 7)   | 7.7 ± 0.3 | 3.29 ± 0.11 |
| A780T/R1034Q                                    | -33.5 ± 0.6 (n = 4)   | 6.1 ± 0.5 | 4.14 ± 0.31 |
| G1193T/K1025Q/R1028Q/R1031Q/R1034Q              | -41.8 ± 0.6           | 8.2 ± 0.6 | 3.09 ± 0.21 |
| A1503G/R1034Q                                   | -27.4 ± 0.5 (n = 4)   | 7.1 ± 0.3 | 3.56 ± 0.13 |
| <b>IVS4 neutralisations</b>                     |                       |           |             |
| IVS4N                                           | No detectable current |           |             |
| R1359Q/R1362Q/R1365Q/K1368Q (IVS4N+R1372)       | No detectable current |           |             |
| R1359Q/R1362Q/R1365Q                            | No detectable current |           |             |
| R1359Q/R1362Q                                   | No detectable current |           |             |
| R1359Q                                          | -6.0 ± 1.0 (n = 5)    | 5.0 ± 0.6 | 5.04 ± 0.60 |
| R1365Q                                          | -5.8 ± 1.0 (n = 5)    | 5.6 ± 1.0 | 4.47 ± 0.79 |
| G1193T/K1025Q/R1028Q                            | -35.8 ± 0.7 (n = 7)   | 8.7 ± 0.6 | 2.89 ± 0.20 |

<sup>a</sup>: Data from Beyl et al. <https://pubmed.ncbi.nlm.nih.gov/22941337/>

<sup>b</sup>: Data from Depil et al. <https://pubmed.ncbi.nlm.nih.gov/21685391/>

Reference: <https://www.ncbi.nlm.nih.gov/pmc/articles/PMC5138263/>

| Mutant              | <i>V</i> <sub>act</sub> , mV | <i>k</i> , mV <sup>a</sup> | Δ <i>G</i> , kcal/Mol | <i>I</i> <sub>max</sub> , pA/pF |
|---------------------|------------------------------|----------------------------|-----------------------|---------------------------------|
| Wild-type           | -18.6 ± 0.9 (n = 8)          | 5.9 ± 0.6                  |                       | 15.1 ± 2.8                      |
| <b>IS6 segment</b>  |                              |                            |                       |                                 |
| L434A               | -39.3 ± 0.9 (n = 5)          | 5.9 ± 0.8                  | -2.03 ± 0.57          | 13.3 ± 2.5                      |
| L434G               | -32.3 ± 0.7 (n = 7)          | 7.6 ± 0.7                  | -0.63 ± 0.31          | 15.7 ± 2.8                      |
| L434N               | -22.0 ± 0.8 (n = 6)          | 6.5 ± 0.7                  | -0.11 ± 0.30          | 12.3 ± 2.1                      |
| L434T               | -30.8 ± 1.3 (n = 6)          | 6.9 ± 0.9                  | -0.76 ± 0.41          | 17.1 ± 3.0                      |
| L434V               | -32.6 ± 0.8 (n = 5)          | 5.9 ± 0.7                  | -1.37 ± 0.44          | 12.6 ± 2.7                      |
| L434M               | -23.0 ± 1.2 (n = 6)          | 4.6 ± 0.7                  | -1.08 ± 0.51          | 14.3 ± 3.2                      |
| L434S               | -28.9 ± 0.7 (n = 6)          | 5.0 ± 0.5                  | -1.55 ± 0.42          | 13.7 ± 2.2                      |
| L434W               | No current                   | N/A                        | N/A                   | N/A                             |
| L434P <sup>b</sup>  | No current                   | N/A                        | N/A                   | N/A                             |
| <b>IIS6 segment</b> |                              |                            |                       |                                 |
| F1191T              | -25.7 ± 1.0 (n = 6)          | 7.1 ± 0.8                  | -0.26 ± 0.32          | 9.6 ± 2.5                       |
| V1192T              | -16.4 ± 0.9 (n = 7)          | 6.9 ± 0.9                  | 0.45 ± 0.28           | 9.1 ± 2.2                       |
| G1193T              | -49.8 ± 1.0 (n = 7)          | 5.1 ± 0.6                  | -3.89 ± 0.72          | 17.5 ± 3.2                      |
| G1193V              | -38.1 ± 0.7 (n = 8)          | 5.6 ± 0.6                  | -2.14 ± 0.48          | 12.3 ± 2.7                      |
| G1193N              | -46.5 ± 1.0 (n = 5)          | 5.6 ± 0.8                  | -2.99 ± 0.73          | 11.2 ± 2.9                      |
| G1193M              | -33.6 ± 0.7 (n = 8)          | 6.4 ± 0.6                  | -1.22 ± 0.36          | 8.4 ± 2.0                       |
| G1193A              | -12.1 ± 1.0 (n = 6)          | 5.7 ± 0.7                  | 0.60 ± 0.28           | 9.3 ± 1.8                       |
| G1193Q              | -39.2 ± 0.8 (n = 5)          | 7.0 ± 0.7                  | -1.42 ± 0.39          | 9.8 ± 2.1                       |
| G1193P              | -37.7 ± 0.7 (n = 7)          | 6.3 ± 0.6                  | -1.63 ± 0.39          | 11.3 ± 2.7                      |
| G1193W              | No current                   | N/A                        | N/A                   | N/A                             |
| F1194T              | -16.5 ± 0.9 (n = 7)          | 7.8 ± 0.9                  | 0.61 ± 0.26           | 17.3 ± 3.2                      |
| V1195T              | -28.9 ± 0.7 (n = 7)          | 5.1 ± 0.7                  | -1.48 ± 0.51          | 18.7 ± 3.4                      |
| I1196T              | -26.6 ± 0.6 (n = 9)          | 4.9 ± 0.6                  | -1.31 ± 0.44          | 18.4 ± 2.7                      |

<sup>a</sup>: in comparison to Wild-Type the changes of slope factors for mutated channels are statistically not significant (p > 0.05)

<sup>b</sup>: Data from Kudrnac et al. (<https://pubmed.ncbi.nlm.nih.gov/19265197/>)

Reference: <https://www.ncbi.nlm.nih.gov/pmc/articles/PMC3016219/>

## S6 Segments: Coupled and Independent Contributions of Residues in IS6 and IIS6 to Activation Gating of CaV1.2

| Mutant                | <i>V</i> <sub>0.5, act</sub> | <i>k</i> <sub>act</sub> | <i>V</i> <sub>0.5, inact</sub> | <i>k</i> <sub>inact</sub> | <i>r</i> <sub>300</sub> |
|-----------------------|------------------------------|-------------------------|--------------------------------|---------------------------|-------------------------|
|                       | mV                           | mV                      | mV                             | mV                        | %                       |
| Wild-type             | -9.9 ± 1.1 (n = 8)           | 6.3 ± 0.7               | -38.7 ± 1.0 (n = 3)            | 8.1 ± 0.9                 | 65 ± 4                  |
| <b>IS6 segment</b>    |                              |                         |                                |                           |                         |
| L429T                 | -16.5 ± 0.6 (n = 5)          | 7.5 ± 0.6               | -42.5 ± 1.1 (n = 3)            | 7.9 ± 0.9                 | 69 ± 6                  |
| L434T                 | -21.9 ± 1.3 (n = 5)          | 6.9 ± 0.9               | -51.1 ± 1.1 (n = 3)            | 8.6 ± 1.0                 | 63 ± 5                  |
| S435T                 | -11.3 ± 0.7 (n = 5)          | 6.1 ± 0.6               | -40.1 ± 0.9 (n = 3)            | 7.7 ± 0.8                 | 64 ± 6                  |
| S435A                 | -15.9 ± 0.6 (n = 6)          | 6.9 ± 0.5               | -44.1 ± 0.9 (n = 4)            | 7.8 ± 0.9                 | 70 ± 5                  |
| S435P                 | -35.8 ± 0.6 (n = 6)          | 8.8 ± 0.6               | -65.7 ± 0.7 (n = 4)            | 7.3 ± 0.7                 | 5 ± 4 <sup>a</sup>      |
| <b>IIS6 segment</b>   |                              |                         |                                |                           |                         |
| L779T                 | -18.6 ± 0.7 (n = 5)          | 6.4 ± 0.6               | -50.5 ± 1.2 (n = 3)            | 7.1 ± 0.6                 | 12 ± 5 <sup>a</sup>     |
| I781T                 | -37.7 ± 1.2 (n = 7)          | 7.2 ± 1.0               | -57.8 ± 0.7 (n = 3)            | 8.9 ± 0.5                 | 47 ± 3 <sup>a</sup>     |
| I781P                 | -47.2 ± 1.1 (n = 8)          | 6.3 ± 0.6               | -68.7 ± 0.8 (n = 5)            | 5.8 ± 0.5                 | 53 ± 6                  |
| <b>Double mutants</b> |                              |                         |                                |                           |                         |
| L429T/I781T           | -44.0 ± 1.0 (n = 7)          | 8.3 ± 0.9               | -61.2 ± 1.0 (n = 4)            | 8.7 ± 0.9                 | 41 ± 5 <sup>a</sup>     |

|             |                     |           |                     |           |                     |
|-------------|---------------------|-----------|---------------------|-----------|---------------------|
| L429T/L779T | -22.5 ± 0.8 (n = 5) | 6.4 ± 0.7 | -49.6 ± 1.3 (n = 3) | 8.0 ± 0.7 | 12 ± 6 <sup>a</sup> |
| L434T/I781T | -50.3 ± 0.8 (n = 5) | 5.4 ± 0.8 | -70.0 ± 1.6 (n = 3) | 8.5 ± 1.2 | 15 ± 4 <sup>a</sup> |
| L434T/L779T | -32.3 ± 0.8 (n = 7) | 7.1 ± 0.7 | -58.2 ± 0.8 (n = 5) | 8.2 ± 0.9 | 52 ± 5              |
| S435A/I781T | -35.3 ± 0.9 (n = 6) | 8.7 ± 0.7 | -59.1 ± 0.9 (n = 4) | 8.1 ± 0.8 | 48 ± 4 <sup>a</sup> |
| S435P/I781T | -43.7 ± 0.9 (n = 5) | 9.1 ± 0.9 | -64.1 ± 1.1 (n = 3) | 8.6 ± 1.0 | 44 ± 5 <sup>a</sup> |
| S435P/I781P | No current          | N/A       | N/A                 | N/A       | N/A                 |

<sup>a</sup>: Data are statistically significantly different from wild type (p < 0.05). Data for wild type, I781T, and I781P are from Hohaus et al. (12). Mutations G422P, S423P, F424P, N428P, L429P, V430T/V430P, L431T/L431P, G432T/G432P, V433T/V433P, L434P, E437P, F438P, and S439P were not functional

Reference: <https://pubmed.ncbi.nlm.nih.gov/19265197/>

## S6 Segments: Timothy Mutation Disrupts the Link between Activation and Inactivation in CaV1.2 Protein

| Construct              | V0.5<br>mV          | kact<br>mV | V0.5,inact<br>mV    | kinact<br>mV | r3000       |
|------------------------|---------------------|------------|---------------------|--------------|-------------|
| <b>Wild-type</b>       |                     |            |                     |              |             |
|                        | -18.4 ± 0.8 (n = 9) | 6.0 ± 0.7  | -41.5 ± 0.9 (n = 5) | 6.4 ± 0.9    | 0.35 ± 0.03 |
| <b>IS6 G432a</b>       |                     |            |                     |              |             |
| G432A                  | -14.2 ± 0.6 (n = 7) | 6.2 ± 0.5  |                     |              | 0.77 ± 0.05 |
| G432M                  | -23.2 ± 0.6 (n = 7) | 7.7 ± 0.6  |                     |              | 0.68 ± 0.07 |
| G432N                  | -34.4 ± 0.4 (n = 7) | 6.5 ± 0.5  |                     |              | 0.72 ± 0.04 |
| G432S                  | -19.2 ± 0.7 (n = 7) | 5.9 ± 0.7  |                     |              | 0.74 ± 0.07 |
| G432V                  | -12.0 ± 0.6 (n = 6) | 5.7 ± 0.5  |                     |              | 0.86 ± 0.04 |
| G432W                  | -33.7 ± 0.6 (n = 8) | 4.7 ± 0.4  |                     |              | 0.58 ± 0.04 |
| <b>IIS6 A780</b>       |                     |            |                     |              |             |
| A780G                  | -29.4 ± 0.6 (n = 5) | 6.2 ± 0.6  | -54.4 ± 1.3 (n = 4) | 6.2 ± 1.1    | 0.11 ± 0.06 |
| A780N                  | -43.8 ± 1.0 (n = 7) | 6.8 ± 0.9  | -67.4 ± 0.7 (n = 4) | 4.6 ± 0.9    | 0.25 ± 0.04 |
| A780P                  | -45.0 ± 0.7 (n = 5) | 5.9 ± 0.8  | -39.4 ± 1.2 (n = 4) | 5.2 ± 1.9    | 0.34 ± 0.07 |
| A780T                  | -44.0 ± 0.6 (n = 5) | 5.1 ± 0.6  | -59.8 ± 0.9 (n = 4) | 7.5 ± 0.9    | 0.24 ± 0.04 |
| A780V                  | -34.6 ± 0.8 (n = 8) | 6.6 ± 0.7  | -54.3 ± 0.8 (n = 4) | 4.8 ± 0.8    | 0.10 ± 0.05 |
| A780W                  | -49.3 ± 0.6 (n = 7) | 5.9 ± 0.5  | -68.0 ± 0.8 (n = 4) | 6.3 ± 0.9    | 0.16 ± 0.05 |
| <b>IIIS6 G1193b</b>    |                     |            |                     |              |             |
| G1193A                 | -12.1 ± 1.0 (n = 6) | 5.7 ± 0.7  | -25.2 ± 1.1 (n = 6) | 8.8 ± 0.9    | 0.27 ± 0.07 |
| G1193M                 | -33.6 ± 0.7 (n = 8) | 6.4 ± 0.6  | -52.8 ± 1.0 (n = 4) | 6.1 ± 0.9    | 0.34 ± 0.08 |
| G1193N                 | -46.5 ± 1.0 (n = 5) | 5.6 ± 0.8  | -61.3 ± 0.9 (n = 4) | 6.9 ± 0.9    | 0.38 ± 0.08 |
| G1193P                 | -37.7 ± 0.7 (n = 7) | 6.3 ± 0.6  | -64.6 ± 1.0 (n = 4) | 6.1 ± 0.8    | 0.18 ± 0.07 |
| G1193Q                 | -39.2 ± 0.8 (n = 5) | 7.0 ± 0.7  | -64.4 ± 1.2 (n = 4) | 8.4 ± 1.1    | 0.29 ± 0.08 |
| G1193T                 | -49.8 ± 1.0 (n = 7) | 5.1 ± 0.6  | -70.0 ± 1.1 (n = 5) | 5.4 ± 1.1    | 0.16 ± 0.07 |
| G1193V                 | -38.1 ± 0.7 (n = 8) | 5.6 ± 0.6  | -60.4 ± 0.8 (n = 5) | 7.5 ± 0.6    | 0.14 ± 0.08 |
| <b>IVS6 A1503</b>      |                     |            |                     |              |             |
| A1503G                 | -41.4 ± 0.8 (n = 5) | 5.8 ± 0.5  | -54.0 ± 1.0 (n = 4) | 4.9 ± 0.8    | 0.31 ± 0.07 |
| A1503M                 | -29.2 ± 0.7 (n = 8) | 5.9 ± 0.7  | -60.1 ± 1.0 (n = 4) | 5.5 ± 1.0    | 0.26 ± 0.08 |
| A1503N                 | -31.5 ± 0.7 (n = 5) | 6.3 ± 0.6  | -45.1 ± 1.1 (n = 4) | 6.0 ± 1.0    | 0.32 ± 0.09 |
| A1503T                 | -17.9 ± 0.8 (n = 7) | 8.7 ± 0.8  | -38.0 ± 1.2 (n = 4) | 6.9 ± 1.1    | 0.29 ± 0.09 |
| A1503V                 | -11.4 ± 0.8 (n = 5) | 7.2 ± 0.6  | -37.2 ± 1.2 (n = 4) | 6.8 ± 1.2    | 0.24 ± 0.06 |
| A1503W                 | -16.9 ± 0.6 (n = 9) | 6.6 ± 0.6  | -38.9 ± 1.3 (n = 4) | 7.5 ± 0.8    | 0.33 ± 0.09 |
| A1503P                 | No current          | N/A        | N/A                 | N/A          | N/A         |
| <b>Double mutation</b> |                     |            |                     |              |             |

|             |                         |               |                         |               |                 |
|-------------|-------------------------|---------------|-------------------------|---------------|-----------------|
| G432S/S435G | $-19.8 \pm 0.9$ (n = 5) | $6.3 \pm 0.7$ | $-39.2 \pm 1.2$ (n = 4) | $5.7 \pm 1.1$ | $0.54 \pm 0.07$ |
|-------------|-------------------------|---------------|-------------------------|---------------|-----------------|

Reference: <https://www.ncbi.nlm.nih.gov/pmc/articles/PMC3173108/>
