# Supplementary material for: Permeabilizing Cell Membranes with Electric Fields
Source: MDPI journal article supplement (doi:10.3390/cancers13092283), 2021-05-10
Supplement: s1 [file s1]

SUPPLEMENTARY TABLE S4. Differences in resting membrane potential (Vm) between cancer and non-cancer cells

| Brain Cancer Membrane Parameters*            |                   |               |                     |                   | Electrophysical properties of neurons**                          | Electrophysiology of brain cells*** |                                           |
|----------------------------------------------|-------------------|---------------|---------------------|-------------------|------------------------------------------------------------------|-------------------------------------|-------------------------------------------|
| Parameter                                    | Glioma Cell Lines |               | Immature Astrocytes | Mature Astrocytes | Avg of different types of neurons in the motor cortex of the cat | Pooled data from 82 neurons         | Pooled data from 69 myenteric glial cells |
|                                              | D54               | STTG1         |                     |                   |                                                                  |                                     |                                           |
| Resting membrane potentials (mV)             | -38.5 ± 4.2       | -28.1 ± 3.5   | -51.1 ± 3.7         | -75.2 ± 0.56      | -63 to -66                                                       | -46 ± 13                            | -55 ± 10 mV                               |
| Input Resistances (MΩ)                       | 260.6 ± 64.7      | 687.2 ± 160.3 | 627.5 ± 164         | 25.4 ± 7.4        | 8.3 to 19.8                                                      | 392 ± 203                           | 90 ± 42                                   |
| Barium (Ba2+) sensitive Kir currents (nS/pF) | 0.169 ± 0.033     | 0.244 ± 0.04  | 0.474 ± 0.12        | 4.06 ± 1.1        |                                                                  |                                     |                                           |
| Action potential amplitudes (mV)             |                   |               |                     |                   | 72 to 77                                                         |                                     |                                           |
| Firing Threshold (mV)                        |                   |               |                     |                   | -54                                                              |                                     |                                           |
| Membrane time constant (ms)                  |                   |               |                     |                   | 7.2 to 15.1                                                      |                                     |                                           |

\*Whole-cell voltage-clamp recordings were obtained by standard methods. Reference: <https://pubmed.ncbi.nlm.nih.gov/14999814/>

\*\*Values measured with intracellular voltage recordings and single-electrode voltage-clamp (SEVC) techniques. Reference: <https://pubmed.ncbi.nlm.nih.gov/8350127/>

\*\*\*Whole-cell voltage clamp recordings were made using an Axopatch 200A amplifier. Reference: <https://pubmed.ncbi.nlm.nih.gov/10762619/>

| Mutational status,* cell radius and dielectric properties of 5 GBM lines studied here. |           |           |                |                 |             |           |                |           |           |               |                     |                |
|----------------------------------------------------------------------------------------|-----------|-----------|----------------|-----------------|-------------|-----------|----------------|-----------|-----------|---------------|---------------------|----------------|
| Cell line                                                                              | p53       | PTEN      | Radius ± SE μm | C m ± SE pF/cm2 | C C ± SE pF | Folding φ | N, cell number | a ± SE μm | β ± SE    | P w ± SE μm/s | α ± SE nmol/(s·cm²) | N, cell number |
| DK-MG                                                                                  | wild type | wild type | 6.3±0.1        | 1.88±0.07       | 9.4±0.2     | 2.38      | 420            | 8.1±0.2   | 0.73±0.01 | 0.59±0.10     | 0.25±0.01           | 40             |
| GaMG                                                                                   | mutated   | wild type | 8.5±0.1        | 3.17±0.12       | 28.8±0.9    | 4         | 300            | 10.0±0.3  | 0.61±0.05 | 4.17±0.07     | 0.46±0.01           | 30             |
| U87-MG                                                                                 | wild type | mutated   | 6.7±0.1        | 2.82±0.09       | 15.9±0.3    | 3.5       | 420            | 7.6±0.2   | 0.71±0.02 | 3.02±0.15     | 0.37±0.01           | 50             |
| U373-MG                                                                                | mutated   | mutated   | 7.1±0.1        | 4.00±0.12       | 25.3±0.7    | 5.25      | 360            | 8.8±0.3   | 0.64±0.08 | 4.05±0.63     | 0.35±0.02           | 20             |
| SNB19                                                                                  | mutated   | mutated   | 6.8±0.1        | 3.71±0.15       | 21.6±0.7    | 4.63      | 360            | 8.5±0.4   | 0.68±0.07 | 2.21±0.16     | 0.48±0.02           | 30             |

Reference: <https://pubmed.ncbi.nlm.nih.gov/24498019/>
