# Supplementary material for: Permeabilizing Cell Membranes with Electric Fields
Source: MDPI journal article supplement (doi:10.3390/cancers13092283), 2021-05-10
Supplement: s1 [file s1]

SUPPLEMENTARY TABLE S3. Parameters of electroporation model

| Parameter                        | Description                                                                                                              | Bioelectrotheological Model                                                                                                                                                                                                                                       | Electroporation Model                                                                                                                                                                                            |                                                                                       |                                                                                                                                        | TTFields                                                                                               | Other Information                                                                                                                                                                                                                                                                                                          | References                                                                                                                                                                                                                                                                                                                                                                                                                                                                                                                 |
|----------------------------------|--------------------------------------------------------------------------------------------------------------------------|-------------------------------------------------------------------------------------------------------------------------------------------------------------------------------------------------------------------------------------------------------------------|------------------------------------------------------------------------------------------------------------------------------------------------------------------------------------------------------------------|---------------------------------------------------------------------------------------|----------------------------------------------------------------------------------------------------------------------------------------|--------------------------------------------------------------------------------------------------------|----------------------------------------------------------------------------------------------------------------------------------------------------------------------------------------------------------------------------------------------------------------------------------------------------------------------------|----------------------------------------------------------------------------------------------------------------------------------------------------------------------------------------------------------------------------------------------------------------------------------------------------------------------------------------------------------------------------------------------------------------------------------------------------------------------------------------------------------------------------|
|                                  |                                                                                                                          |                                                                                                                                                                                                                                                                   | Direct Current (DC) Field/Rectangular Pulses                                                                                                                                                                     | Radio Frequency (RF) Field                                                            | Alternating Current (AC) Field                                                                                                         |                                                                                                        |                                                                                                                                                                                                                                                                                                                            |                                                                                                                                                                                                                                                                                                                                                                                                                                                                                                                            |
| Time of application              | Duration that the electric field applied                                                                                 |                                                                                                                                                                                                                                                                   | Short: 10µs (rectangle pulse) or exponential decay by discharging capacitor                                                                                                                                      | Medium: 2ms                                                                           | Long: 40ms                                                                                                                             | Continuous and long: Ideally for up to hours at a time                                                 |                                                                                                                                                                                                                                                                                                                            | <a href="https://pubmed.ncbi.nlm.nih.gov/30534421/">https://pubmed.ncbi.nlm.nih.gov/30534421/</a> ,<br><a href="https://pubmed.ncbi.nlm.nih.gov/29260225/">https://pubmed.ncbi.nlm.nih.gov/29260225/</a> ,<br><a href="https://pubmed.ncbi.nlm.nih.gov/2819230/">https://pubmed.ncbi.nlm.nih.gov/2819230/</a> ,<br><a href="https://www.btxonline.com/media/wysiwyg/protocol_db/Electroporation%20Optimization%20Guide.pdf">https://www.btxonline.com/media/wysiwyg/protocol_db/Electroporation Optimization Guide.pdf</a> |
| Optimal frequencies              | Frequency at which the AEF model is most effective                                                                       | Susceptibility to electroporation varies nonlinearly with frequency                                                                                                                                                                                               | No: DC frequency is 0 kHz                                                                                                                                                                                        | Yes: RF frequency is 40 kHz (from 20 kHz to 300 GHz)                                  | Yes: 10 kHz to 1 MHz, optimal at 40-120 kHz                                                                                            | Yes: 200 kHz                                                                                           | *DNA transfection observed to be most effective in the 100-1000 Hz range                                                                                                                                                                                                                                                   | <a href="https://pubmed.ncbi.nlm.nih.gov/30534421/">https://pubmed.ncbi.nlm.nih.gov/30534421/</a> ,<br><a href="https://pubmed.ncbi.nlm.nih.gov/8369458/">https://pubmed.ncbi.nlm.nih.gov/8369458/</a> ,<br><a href="https://pubmed.ncbi.nlm.nih.gov/2819230/">https://pubmed.ncbi.nlm.nih.gov/2819230/</a>                                                                                                                                                                                                                |
| Intensity/field strength         | Relative level of electric field intensity delivered                                                                     |                                                                                                                                                                                                                                                                   | Yes: 0.25-3 kV/cm                                                                                                                                                                                                | Yes: optimal at E=1.8-2.1 kV/cm (but oscillating)                                     | Yes: experimental values of 500-700 V/cm                                                                                               | Yes: 2 V/cm                                                                                            | *Strength of the electric field is proportional to the transmembrane voltage (Kotnik et al.)                                                                                                                                                                                                                               | <a href="https://pubmed.ncbi.nlm.nih.gov/2819230/">https://pubmed.ncbi.nlm.nih.gov/2819230/</a> ,<br><a href="https://pubmed.ncbi.nlm.nih.gov/30534421/">https://pubmed.ncbi.nlm.nih.gov/30534421/</a>                                                                                                                                                                                                                                                                                                                     |
| Pore formation                   | Pore formation as a result of membrane destabilization                                                                   | Yes                                                                                                                                                                                                                                                               | Yes: 1-ms 40 kV/m pulse: ~341,000 pores, of which 97.8% are small (=1 nm radius) and the avg radius of large pores is 22.8 ± 18.7 nm, although some pores grow to 419 nm, diameter of pores ranges from 25-120nm | Yes                                                                                   |                                                                                                                                        | Yes: increased number of holes >51nm*2 (radius of 4.1nm) in size, avg size of holes 240.6 +/- 91.7nm*2 | *And ion channel activation by short (submicrosecond) pulses with high amplitudes                                                                                                                                                                                                                                          | <a href="https://pubmed.ncbi.nlm.nih.gov/17056739/">https://pubmed.ncbi.nlm.nih.gov/17056739/</a> ,<br><a href="https://pubmed.ncbi.nlm.nih.gov/2819230/">https://pubmed.ncbi.nlm.nih.gov/2819230/</a> ,<br><a href="https://pubmed.ncbi.nlm.nih.gov/30534421/">https://pubmed.ncbi.nlm.nih.gov/30534421/</a> ,<br><a href="https://pubmed.ncbi.nlm.nih.gov/8369458/">https://pubmed.ncbi.nlm.nih.gov/8369458/</a> ,<br><a href="https://pubmed.ncbi.nlm.nih.gov/30534421/">https://pubmed.ncbi.nlm.nih.gov/30534421/</a>  |
| Reversibility                    | Are the effects temporal or permanent?                                                                                   | Yes, formation of pores and membrane damage are temporal                                                                                                                                                                                                          | Yes and No: up to a critical potential (depends on time and field strength), pore closing is fast (ms to min)                                                                                                    | Yes                                                                                   | Unknown                                                                                                                                | Yes                                                                                                    | *Irreversible electroporation has been studied for cancer treatment                                                                                                                                                                                                                                                        | <a href="https://pubmed.ncbi.nlm.nih.gov/1387010/">https://pubmed.ncbi.nlm.nih.gov/1387010/</a> ,<br><a href="https://pubmed.ncbi.nlm.nih.gov/30669316/">https://pubmed.ncbi.nlm.nih.gov/30669316/</a> ,<br><a href="https://pubmed.ncbi.nlm.nih.gov/30786231/">https://pubmed.ncbi.nlm.nih.gov/30786231/</a>                                                                                                                                                                                                              |
| Maximal membrane potential       | Equal to or greater than the potential at which the membrane is perforated at the 2 loci facing the electrodes           |                                                                                                                                                                                                                                                                   | $V_m = 1.5rEc\cos\theta$                                                                                                                                                                                         |                                                                                       | $\Delta\psi_{membr} = \frac{1.5aE\cos\theta}{\left[1+(\omega\tau)^2\right]^{1/2}}$                                                     | $\Delta V = \int_s E_e R \cos\theta \frac{1}{1+j\omega\tau_m}$                                         | *at low frequencies the intensity (E) is independent of the ac frequency. At high frequencies, E increases with frequency (Marszalek et al.) However, this is disputed in Zhan et al. which shows that frequency does matter at lower ranges and points out that frequency is inversely related to transmembrane potential | <a href="https://pubmed.ncbi.nlm.nih.gov/2248989/">https://pubmed.ncbi.nlm.nih.gov/2248989/</a> ,<br><a href="https://pubmed.ncbi.nlm.nih.gov/2819230/">https://pubmed.ncbi.nlm.nih.gov/2819230/</a> ,<br><a href="https://pubmed.ncbi.nlm.nih.gov/22516092/">https://pubmed.ncbi.nlm.nih.gov/22516092/</a> ,<br><a href="https://pubmed.ncbi.nlm.nih.gov/31940516/">https://pubmed.ncbi.nlm.nih.gov/31940516/</a>                                                                                                         |
| Membrane destabilization         | Is the plasma membrane affected by the AEF model?                                                                        | Yes: shear stress leads to physical deformations of cell shape and extensil stress leads to membrane destabilization and electroporation                                                                                                                          | Yes: electrical breakdown of membrane and surface tension                                                                                                                                                        | Yes                                                                                   | Yes: electrical breakdown and dielectrophoresis                                                                                        | Yes                                                                                                    |                                                                                                                                                                                                                                                                                                                            | <a href="https://pubmed.ncbi.nlm.nih.gov/30786231/">https://pubmed.ncbi.nlm.nih.gov/30786231/</a> ,<br><a href="https://pubmed.ncbi.nlm.nih.gov/2819230/">https://pubmed.ncbi.nlm.nih.gov/2819230/</a> ,<br><a href="https://pubmed.ncbi.nlm.nih.gov/30534421/">https://pubmed.ncbi.nlm.nih.gov/30534421/</a>                                                                                                                                                                                                              |
| Effect on ion channels           | Findings that ion channels can be affected by electric fields                                                            |                                                                                                                                                                                                                                                                   | Yes: ion channel conductivity increased by short (submicrosecond) pulses with high amplitudes, however, dependent on a variety of factors                                                                        |                                                                                       |                                                                                                                                        | Yes: CaV1.2 activation                                                                                 |                                                                                                                                                                                                                                                                                                                            | <a href="https://pubmed.ncbi.nlm.nih.gov/21080060/">https://pubmed.ncbi.nlm.nih.gov/21080060/</a> ,<br><a href="https://pubmed.ncbi.nlm.nih.gov/30669316/">https://pubmed.ncbi.nlm.nih.gov/30669316/</a>                                                                                                                                                                                                                                                                                                                   |
| Effect on cytoskeleton           | Findings show that electric fields can affect the polar subunits such as tubulin, actin, septin, etc                     |                                                                                                                                                                                                                                                                   | Yes: F-actin and beta-tubulin disrupted—and this effect is reversible (however unconfirmed whether this is a direct or indirect result of the electric field exposure)                                           |                                                                                       |                                                                                                                                        | Yes: affects tubulin and septin                                                                        |                                                                                                                                                                                                                                                                                                                            | <a href="https://pubmed.ncbi.nlm.nih.gov/17172418/">https://pubmed.ncbi.nlm.nih.gov/17172418/</a> ,<br><a href="https://pubmed.ncbi.nlm.nih.gov/26658786/">https://pubmed.ncbi.nlm.nih.gov/26658786/</a>                                                                                                                                                                                                                                                                                                                   |
| Cell survival                    | Survival of the exposed cell                                                                                             | Yes                                                                                                                                                                                                                                                               | Yes: depends on intensity and time                                                                                                                                                                               | Yes: at optimal intensity survivability is ~80-70% (RF ~3x more gentle than DC field) | Yes                                                                                                                                    |                                                                                                        |                                                                                                                                                                                                                                                                                                                            | <a href="https://pubmed.ncbi.nlm.nih.gov/2819230/">https://pubmed.ncbi.nlm.nih.gov/2819230/</a> ,<br><a href="https://pubmed.ncbi.nlm.nih.gov/1387010/">https://pubmed.ncbi.nlm.nih.gov/1387010/</a>                                                                                                                                                                                                                                                                                                                       |
| Impact on cancer cells           | Has the model been studied on cancer cells?                                                                              | Not studied                                                                                                                                                                                                                                                       | Yes: study on calcium electroporation found that cancer cells were much more sensitive to electroporation than normal cells                                                                                      |                                                                                       | Yes: myeloma cells found to have a lower critical membrane potential (point of membrane perforation) 0.95 V versus 1 V in normal cells | Yes                                                                                                    | *Studies suggest that differences could be caused by a difference in repair capacities                                                                                                                                                                                                                                     | <a href="https://pubmed.ncbi.nlm.nih.gov/2248989/">https://pubmed.ncbi.nlm.nih.gov/2248989/</a> ,<br><a href="https://pubmed.ncbi.nlm.nih.gov/28681243/">https://pubmed.ncbi.nlm.nih.gov/28681243/</a> ,<br><a href="https://pubmed.ncbi.nlm.nih.gov/31991784/">https://pubmed.ncbi.nlm.nih.gov/31991784/</a>                                                                                                                                                                                                              |
| Electric field exposure          | What duration/type of electric field                                                                                     | Yes: oscillating                                                                                                                                                                                                                                                  | Yes: pulsing                                                                                                                                                                                                     | Yes: oscillating                                                                      | Yes: alternating (aka oscillating)                                                                                                     | Yes: alternating (aka oscillating)                                                                     | *Oscillating electric fields may cause increased mechanical stress on the membrane compared to pulsing (Chang et al.).                                                                                                                                                                                                     | <a href="https://pubmed.ncbi.nlm.nih.gov/2819230/">https://pubmed.ncbi.nlm.nih.gov/2819230/</a> ,<br><a href="https://pubmed.ncbi.nlm.nih.gov/2601349/">https://pubmed.ncbi.nlm.nih.gov/2601349/</a> ,<br><a href="https://pubmed.ncbi.nlm.nih.gov/30534421/">https://pubmed.ncbi.nlm.nih.gov/30534421/</a>                                                                                                                                                                                                                |
| Localization                     | The effects of the electric field are targeted and localized in a predicted area                                         |                                                                                                                                                                                                                                                                   | Yes                                                                                                                                                                                                              | Yes                                                                                   | Yes                                                                                                                                    | Yes                                                                                                    |                                                                                                                                                                                                                                                                                                                            | <a href="https://pubmed.ncbi.nlm.nih.gov/30786231/">https://pubmed.ncbi.nlm.nih.gov/30786231/</a> ,<br><a href="https://pubmed.ncbi.nlm.nih.gov/30786231/">https://pubmed.ncbi.nlm.nih.gov/30786231/</a>                                                                                                                                                                                                                                                                                                                   |
| Probability of poration          | How effective is the AEF model at porating the membrane?                                                                 | Susceptibility to electroporation (s[p]) was represented by the reciprocal of the extensil stress needed for electroporation (σ0e[p]), i.e., s[p] = (σ0e[p]) <sup>-1</sup> ; increases with frequency and decreases with increasing external medium conductivity. |                                                                                                                                                                                                                  | Transfection rate for RF is 2x greater than for DC                                    | At the 2 loci it is equal for AC and DC fields                                                                                         |                                                                                                        |                                                                                                                                                                                                                                                                                                                            | <a href="https://pubmed.ncbi.nlm.nih.gov/2819230/">https://pubmed.ncbi.nlm.nih.gov/2819230/</a> ,<br><a href="https://pubmed.ncbi.nlm.nih.gov/8369458/">https://pubmed.ncbi.nlm.nih.gov/8369458/</a>                                                                                                                                                                                                                                                                                                                       |
| Membrane electrical conductivity | Any changes in electrical conductivity/voltage?                                                                          |                                                                                                                                                                                                                                                                   | Yes: increases within 1µs after onset of electrical pulse                                                                                                                                                        |                                                                                       |                                                                                                                                        |                                                                                                        |                                                                                                                                                                                                                                                                                                                            | <a href="https://pubmed.ncbi.nlm.nih.gov/30786231/">https://pubmed.ncbi.nlm.nih.gov/30786231/</a>                                                                                                                                                                                                                                                                                                                                                                                                                          |
| Cell diameter                    | Generally smaller cell diameters require higher voltage and larger diameters require lower voltages                      |                                                                                                                                                                                                                                                                   | Yes                                                                                                                                                                                                              | Yes                                                                                   | Yes                                                                                                                                    |                                                                                                        |                                                                                                                                                                                                                                                                                                                            | <a href="https://www.btxonline.com/media/wysiwyg/protocol_db/Electroporation%20Optimization%20Guide.pdf">https://www.btxonline.com/media/wysiwyg/protocol_db/Electroporation Optimization Guide.pdf</a>                                                                                                                                                                                                                                                                                                                    |
| DNA concentration                | Increase in DNA concentration directly increases transfection efficiency                                                 |                                                                                                                                                                                                                                                                   | Yes                                                                                                                                                                                                              | Yes                                                                                   | Yes                                                                                                                                    |                                                                                                        |                                                                                                                                                                                                                                                                                                                            | <a href="https://pubmed.ncbi.nlm.nih.gov/10932162/">https://pubmed.ncbi.nlm.nih.gov/10932162/</a> ,<br><a href="https://www.btxonline.com/media/wysiwyg/protocol_db/Electroporation%20Optimization%20Guide.pdf">https://www.btxonline.com/media/wysiwyg/protocol_db/Electroporation Optimization Guide.pdf</a>                                                                                                                                                                                                             |
| Temperature                      | The temperature affects the efficiency of electroporation                                                                |                                                                                                                                                                                                                                                                   | Yes: ideal temp. still being investigated but heating at around 42°C has improved transfection efficiency, while keeping at lower temp delays pore closure                                                       | Yes                                                                                   | Yes                                                                                                                                    |                                                                                                        |                                                                                                                                                                                                                                                                                                                            | <a href="https://pubmed.ncbi.nlm.nih.gov/28924200/">https://pubmed.ncbi.nlm.nih.gov/28924200/</a> ,<br><a href="https://www.btxonline.com/media/wysiwyg/protocol_db/Electroporation%20Optimization%20Guide.pdf">https://www.btxonline.com/media/wysiwyg/protocol_db/Electroporation Optimization Guide.pdf</a>                                                                                                                                                                                                             |
| Electroporation buffer           | Ionic strength, pH and volume of liquid have an effect on resistance which in turn affects pulse length or time constant |                                                                                                                                                                                                                                                                   | Yes                                                                                                                                                                                                              | Yes                                                                                   | Yes                                                                                                                                    |                                                                                                        |                                                                                                                                                                                                                                                                                                                            | <a href="https://www.btxonline.com/media/wysiwyg/protocol_db/Electroporation%20Optimization%20Guide.pdf">https://www.btxonline.com/media/wysiwyg/protocol_db/Electroporation Optimization Guide.pdf</a>                                                                                                                                                                                                                                                                                                                    |
| Cuvette gap size                 | The distance between electrodes has an optimal gap size and can influence optimal field strength                         |                                                                                                                                                                                                                                                                   | Yes: optimal size for mammalian cells is 2-4mm                                                                                                                                                                   | Yes                                                                                   | Yes                                                                                                                                    | No                                                                                                     | *field strength = voltage/gap size                                                                                                                                                                                                                                                                                         | <a href="https://www.ncbi.nlm.nih.gov/pmc/articles/PMC4642621/">https://www.ncbi.nlm.nih.gov/pmc/articles/PMC4642621/</a> ,<br><a href="https://www.btxonline.com/media/wysiwyg/protocol_db/Electroporation%20Optimization%20Guide.pdf">https://www.btxonline.com/media/wysiwyg/protocol_db/Electroporation Optimization Guide.pdf</a>                                                                                                                                                                                     |
| Number of pulses                 | Number of pulses typically increases as voltage decreases to progressively permeate the membrane                         |                                                                                                                                                                                                                                                                   | Yes                                                                                                                                                                                                              |                                                                                       |                                                                                                                                        | No: not necessarily number of pulses but yes frequency                                                 |                                                                                                                                                                                                                                                                                                                            | <a href="https://www.btxonline.com/media/wysiwyg/protocol_db/Electroporation%20Optimization%20Guide.pdf">https://www.btxonline.com/media/wysiwyg/protocol_db/Electroporation Optimization Guide.pdf</a>                                                                                                                                                                                                                                                                                                                    |
| pH                               | Electroporation efficiency and cell survivability impacted by extracellular pH                                           |                                                                                                                                                                                                                                                                   | Yes: permeabilization threshold constant at pH 7.8 and 6.5, after exposure to pulse amplitude greater than threshold cell survivability greater at 6.5pH but efficiency decreased                                |                                                                                       |                                                                                                                                        |                                                                                                        |                                                                                                                                                                                                                                                                                                                            | <a href="https://pubmed.ncbi.nlm.nih.gov/31440480/">https://pubmed.ncbi.nlm.nih.gov/31440480/</a>                                                                                                                                                                                                                                                                                                                                                                                                                          |

|             |                                                               |                                                                                                                            |                                                           |  |    |                                                                                                                                                                                                                                                                                                                                                                                                              |
|-------------|---------------------------------------------------------------|----------------------------------------------------------------------------------------------------------------------------|-----------------------------------------------------------|--|----|--------------------------------------------------------------------------------------------------------------------------------------------------------------------------------------------------------------------------------------------------------------------------------------------------------------------------------------------------------------------------------------------------------------|
| Cell damage | Side effects of the electrical field that lead to cell damage | Yes: extensil stress destabilizes cell membrane and leads to poration, shear stress leads to physical deformations of cell | Yes: electrolysis and joule heating at site of electrodes |  | No | <a href="https://pubmed.ncbi.nlm.nih.gov/30804395/">https://pubmed.ncbi.nlm.nih.gov/30804395/</a><br><a href="https://pubmed.ncbi.nlm.nih.gov/29681995/">https://pubmed.ncbi.nlm.nih.gov/29681995/</a><br><a href="https://pubmed.ncbi.nlm.nih.gov/1387010/">https://pubmed.ncbi.nlm.nih.gov/1387010/</a><br><a href="https://pubmed.ncbi.nlm.nih.gov/8789120/">https://pubmed.ncbi.nlm.nih.gov/8789120/</a> |
|-------------|---------------------------------------------------------------|----------------------------------------------------------------------------------------------------------------------------|-----------------------------------------------------------|--|----|--------------------------------------------------------------------------------------------------------------------------------------------------------------------------------------------------------------------------------------------------------------------------------------------------------------------------------------------------------------------------------------------------------------|

Notes:

Parameters in rows 3-13 were used to create Table 4 in the main manuscript. Rows 14-25 are additional parameters.
