# Supplementary material for: Permeabilizing Cell Membranes with Electric Fields
Source: MDPI journal article supplement (doi:10.3390/cancers13092283), 2021-05-10
Supplement: s1 [file s1]

SUPPLEMENTARY TABLE S2. Parameters of bioelectrorheological model

| Parameter                                                                                    | Description                                                                                                                                                                                                                                                                                             | Bioelectrorheological Model                               |                      | Electroporation Model | TTFields    | Notes                                                                                                                                                                                                                                                                                             |
|----------------------------------------------------------------------------------------------|---------------------------------------------------------------------------------------------------------------------------------------------------------------------------------------------------------------------------------------------------------------------------------------------------------|-----------------------------------------------------------|----------------------|-----------------------|-------------|---------------------------------------------------------------------------------------------------------------------------------------------------------------------------------------------------------------------------------------------------------------------------------------------------|
|                                                                                              |                                                                                                                                                                                                                                                                                                         | Membrane Destabilization (Contributes to Electroporation) | Electrofusison       |                       |             |                                                                                                                                                                                                                                                                                                   |
| *Frequency of Electric Field                                                                 | At high frequencies shear stress within the membrane decreases and reaches a constant value corresponding to dielectric stress solely                                                                                                                                                                   | Yes, $f = 7 \times 10^4$ Hz to $3 \times 10^5$ Hz         |                      | Yes                   | Yes 200 kHz | *Ratio of cells susceptible to electroporation: cells susceptible to electrodestruction constant at low frequencies but decreased at higher frequencies ( $f \approx 1.0 \times 10^4$ Hz), implying both processes are due to different mechanisms and/or involve different molecular structures. |
| Initial outer cell radius                                                                    | -                                                                                                                                                                                                                                                                                                       | Yes                                                       |                      |                       |             |                                                                                                                                                                                                                                                                                                   |
| Reversibility                                                                                | Under the applied stress only reversible, nondamaging viscoelastic deformations were developed                                                                                                                                                                                                          | Yes                                                       |                      | Yes                   | Yes         |                                                                                                                                                                                                                                                                                                   |
| Susceptibility to electroporation                                                            | Expression of extensil stress leading to electroporation, increased with frequency, highest at $f \approx 10^5$ Hz                                                                                                                                                                                      | Yes                                                       |                      |                       |             |                                                                                                                                                                                                                                                                                                   |
| Induced cell membrane potential                                                              | Increased with frequency                                                                                                                                                                                                                                                                                | Yes                                                       |                      |                       |             |                                                                                                                                                                                                                                                                                                   |
| Susceptibility to destabilization                                                            | Dependent on frequency, increases with frequency, varies depending on cell type, $f \approx 10^4$ Hz a steep increase in this susceptibility occurred possibly explained by resonance oscillations of the susceptible structures and from accompanying increase in heat supplied to the system          | Yes, highest at $f \approx 10^5$ Hz                       |                      | Yes                   |             |                                                                                                                                                                                                                                                                                                   |
| Applied extensil stress                                                                      | Dependent on frequency, increases with frequency, varies depending on cell type, $f \approx 10^4$ Hz a steep increase in this susceptibility occurred possibly explained by resonance oscillations of the susceptible structures and from accompanying increase in heat supplied to the system          | Yes                                                       |                      |                       |             |                                                                                                                                                                                                                                                                                                   |
| Width of the pulse of the alternating field                                                  | 200 ms for myeloma and 2 s for the N. crassa cells lead to electrodestruction                                                                                                                                                                                                                           | Yes                                                       |                      |                       |             |                                                                                                                                                                                                                                                                                                   |
| Voltage amplitude                                                                            | Voltage amplitude at which electrodestruction begins to be observed                                                                                                                                                                                                                                     | Yes                                                       |                      |                       |             |                                                                                                                                                                                                                                                                                                   |
| Field strength                                                                               | Of electric field                                                                                                                                                                                                                                                                                       | Yes                                                       |                      |                       |             |                                                                                                                                                                                                                                                                                                   |
| Coefficient of combination $\alpha$                                                          | Describes the unknown part of heat essential in destabilization processes.                                                                                                                                                                                                                              | Yes                                                       |                      |                       |             |                                                                                                                                                                                                                                                                                                   |
| Viscosity of cellular structures (coefficient of viscosity)                                  | Influenced by membrane proteins and cytoskeletal network. Sigmoidal decrease in the viscosity of structures reactive to the frequency of stress oscillations at $f \approx 10^4$ Hz to $10^5$ Hz, also affects membrane susceptibility to destabilization                                               | Yes                                                       |                      |                       |             |                                                                                                                                                                                                                                                                                                   |
| Heat energy                                                                                  | Heat energy was mainly responsible for destabilization of the membrane at high frequencies, Joule heat amplified at pore openings, influencing membrane susceptibility                                                                                                                                  | Yes                                                       | Yes                  |                       |             |                                                                                                                                                                                                                                                                                                   |
| Ionic strength of the external medium                                                        | Influence the mechanical susceptibility of Tib9 cells to electroporation                                                                                                                                                                                                                                | Yes                                                       |                      | Yes                   |             |                                                                                                                                                                                                                                                                                                   |
| Energy of intermolecular interactions responsible for the integrity of the membrane.         | Proportional to yield of electrofusion, thermal chaotic motion may promote mixing of membrane molecules of two neighboring cells remaining at a short distance, affecting electrofusion                                                                                                                 |                                                           | Yes                  |                       |             |                                                                                                                                                                                                                                                                                                   |
| Density of energy expended                                                                   | Higher for electrodestruction than electroporation, increases for electroporation with increase of external medium conductivity.                                                                                                                                                                        | Yes                                                       |                      | Yes                   |             |                                                                                                                                                                                                                                                                                                   |
| Membrane inertia                                                                             | Related to membrane viscosity                                                                                                                                                                                                                                                                           | Yes                                                       | Yes                  |                       |             |                                                                                                                                                                                                                                                                                                   |
| Cytoplasm and cytoskeletal interaction                                                       | Influence membrane viscosity and inertia                                                                                                                                                                                                                                                                | Yes                                                       |                      |                       |             |                                                                                                                                                                                                                                                                                                   |
| Initial tension in membrane                                                                  | In absence of electric field                                                                                                                                                                                                                                                                            | Yes                                                       |                      | Yes                   |             |                                                                                                                                                                                                                                                                                                   |
| Density of isothermal work performed against the intermolecular forces and of intrinsic heat | Related to disruptive effects in the membrane and increase in the energy of intermolecular interactions responsible for the integrity of the membrane                                                                                                                                                   | Yes                                                       | Yes                  | Yes                   |             |                                                                                                                                                                                                                                                                                                   |
| Membrane viscosity                                                                           | -                                                                                                                                                                                                                                                                                                       | Yes                                                       | Insignificant effect |                       |             |                                                                                                                                                                                                                                                                                                   |
| Complex dielectric permeability                                                              | -                                                                                                                                                                                                                                                                                                       | Yes                                                       |                      |                       |             |                                                                                                                                                                                                                                                                                                   |
| Complex specific electric conductivity                                                       | -                                                                                                                                                                                                                                                                                                       | Yes                                                       |                      |                       |             |                                                                                                                                                                                                                                                                                                   |
| Mechanical stress                                                                            | Theoretically evaluated by including into calculations the dielectric permittivity and electric conductivity of the external and internal medium and the membrane, nonzero magnitude of field frequency, variations of cytoplasmic pressure (bound to cell deformation), and curvature of cell surface. | Yes                                                       |                      |                       |             |                                                                                                                                                                                                                                                                                                   |
| Length of deformed cell along the electric field direction                                   | -                                                                                                                                                                                                                                                                                                       | Yes                                                       |                      |                       |             |                                                                                                                                                                                                                                                                                                   |
| Cell membrane thickness                                                                      | -                                                                                                                                                                                                                                                                                                       | Yes                                                       |                      |                       |             |                                                                                                                                                                                                                                                                                                   |
| Solid angle element                                                                          | -                                                                                                                                                                                                                                                                                                       | Yes                                                       |                      |                       |             |                                                                                                                                                                                                                                                                                                   |
| Electrode radius                                                                             | -                                                                                                                                                                                                                                                                                                       | Yes                                                       |                      |                       |             |                                                                                                                                                                                                                                                                                                   |
| Distance between electrodes                                                                  | -                                                                                                                                                                                                                                                                                                       | Yes                                                       |                      |                       |             |                                                                                                                                                                                                                                                                                                   |
| Dielectric permeability                                                                      | -                                                                                                                                                                                                                                                                                                       | Yes                                                       |                      |                       |             |                                                                                                                                                                                                                                                                                                   |
| Dielectric permeability of vacuum                                                            | -                                                                                                                                                                                                                                                                                                       | Yes                                                       |                      |                       |             |                                                                                                                                                                                                                                                                                                   |
| Surface pressure                                                                             | -                                                                                                                                                                                                                                                                                                       | Yes                                                       |                      |                       |             |                                                                                                                                                                                                                                                                                                   |
| Complex amplitude of extensil stress oscillations                                            | -                                                                                                                                                                                                                                                                                                       | Yes                                                       |                      |                       |             |                                                                                                                                                                                                                                                                                                   |

| References                                                                                      | Notes                                                                                                      |
|-------------------------------------------------------------------------------------------------|------------------------------------------------------------------------------------------------------------|
| <a href="https://pubmed.ncbi.nlm.nih.gov/2601349/">https://pubmed.ncbi.nlm.nih.gov/2601349/</a> |                                                                                                            |
| <a href="https://pubmed.ncbi.nlm.nih.gov/2533955/">https://pubmed.ncbi.nlm.nih.gov/2533955/</a> | Rows 3-7 of this supplemental table are mentioned in Table 3 of main manuscript. Rows 8-35 are additional. |
| <a href="https://pubmed.ncbi.nlm.nih.gov/1387010/">https://pubmed.ncbi.nlm.nih.gov/1387010/</a> |                                                                                                            |

|                                                                                                 |  |
|-------------------------------------------------------------------------------------------------|--|
| <a href="https://pubmed.ncbi.nlm.nih.gov/8789120/">https://pubmed.ncbi.nlm.nih.gov/8789120/</a> |  |
| <a href="https://pubmed.ncbi.nlm.nih.gov/8369458/">https://pubmed.ncbi.nlm.nih.gov/8369458/</a> |  |
